# Supplementary material for: Stability Characterization of the Novel Anti-Cancer HM-10/10 HDL-Mimetic Peptide
Source: MDPI journal article supplement (doi:10.3390/ijms241210054), 2023-06-13
Supplement: s1 [file s1]

## SUPPLEMENTARY MATERIAL

### Determination of Stability of HM1010 in CD-1 Mouse, Sprague-Dawley Rat, Beagle Dog, Cynomolgus Monkey, and Human Liver Microsomes and Cryopreserved Hepatocytes

Report No. ZXAA-0007-DV-HB-RPT-01  
Testing Facility Study Nos. ZXAA-0007-DV-HB (Microsomes)  
and ZXAA-0008-DV-IB (Hepatocytes)

#### STUDY SUMMARIES

The purpose of these studies was to determine the in-vitro stability of HM1010 in CD-1 mouse, Sprague-Dawley rat, beagle dog, cynomolgus monkey, and human liver microsomes and cryopreserved hepatocytes.

For ZXAA-0007-DV-HB, the test and control articles (HM1010 and verapamil) were tested at a concentration of 2  $\mu$ M in pooled liver microsomes, 0.5 mg protein/mL, of each species. The test and control articles were incubated at 37°C for 120 minutes. At the assay points (time zero, 15, 30, 60, 90, and 120 minutes), samples were removed for analysis by LC-MS/MS. Calculations were performed using peak area ratios.

Microsomal stability results for HM1010 are summarized below:

| Species            | T <sub>1/2</sub><br>(min) | % Remaining<br>at 120 min | CL <sub>int</sub><br>(mL/min/kg) |
|--------------------|---------------------------|---------------------------|----------------------------------|
| CD-1 mouse         | 32.0                      | 0.8                       | 170                              |
| Sprague-Dawley rat | 27.7                      | 3.7                       | 101                              |
| Beagle dog         | 33.0                      | 1.5                       | 47.2                             |
| Cynomolgus monkey  | 21.8                      | 0.8                       | 85.8                             |
| Human              | 20.3                      | 1.4                       | 61.5                             |

The estimated half-life for HM1010 at 2  $\mu$ M in the presence of CD-1 mouse, Sprague-Dawley rat, beagle dog, cynomolgus monkey, and human liver microsomes (0.5 mg proteins/mL) was 32.0 minutes, 27.7 minutes, 33.0 minutes, 21.8 minutes, and 20.3 minutes, respectively.

After incubation (120 minutes at 37°C) the percentage of HM1010 remaining was 0.8% in CD-1 mouse liver microsomes, 3.7% in Sprague-Dawley rat liver microsomes, 1.5% in beagle dog liver microsomes, 0.8% in cynomolgus monkey liver microsomes, and 1.4% in human liver microsomes.

The intrinsic clearance values for HM1010 were 170 mL/min/kg in CD-1 mouse microsomes, 101 mL/min/kg in Sprague-Dawley rat microsomes, 47.2 mL/min/kg in beagle dog microsomes, 85.8 mL/min/kg in cynomolgus monkey microsomes, and 61.5 mL/min/kg in human microsomes.

Results for the control (verapamil) demonstrated acceptable performance of the assay.

For ZXAA-0008-DV-IB, the test and control articles (HM1010 and verapamil) were tested at a concentration of 2  $\mu\text{M}$  in liver hepatocytes, 0.5 million cells/mL, of each species. The test and control articles were incubated at 37°C for 180 minutes. At the assay points (time zero, 15, 30, 60, 120, and 180 minutes), samples were removed for analysis by LC-MS/MS. Calculations were performed using peak area ratios.

Hepatocyte metabolic stability results for HM1010 are summarized below:

| Matrix             | $T_{1/2}$<br>(minutes) | % Remaining<br>at 30 minutes | $CL_{int}$<br>(mL/min/kg) |
|--------------------|------------------------|------------------------------|---------------------------|
| CD-1 mouse         | < 15                   | 0.7                          | >1090                     |
| Sprague-Dawley rat | 5.81                   | 1.0                          | 1260                      |
| Beagle dog         | 10.7                   | 16.0                         | 699                       |
| Cynomolgus monkey  | 12.1                   | 18.5                         | 465                       |
| Human              | 5.28                   | 2.47                         | 708                       |

The estimated half-life for HM1010 at 2  $\mu\text{M}$  in the presence of CD-1 mouse, Sprague-Dawley rat, beagle dog, cynomolgus monkey, and human hepatocytes (0.5 million cells/mL) was <15 minutes, 5.81 minutes, 10.7 minutes, 12.1 minutes, and 5.28 minutes, respectively.

After incubation (30 minutes at 37°C) in the presence of CD-1 mouse, Sprague-Dawley rat, beagle dog, cynomolgus monkey, and human hepatocytes, the percentage of HM1010 remaining was 0.7%, 1.0%, 16.0%, 18.5%, and 2.5%, respectively.

The intrinsic clearance ( $CL_{int}$ ) values for HM1010 were >1090 mL/min/kg (mouse), 1260 mL/min/kg (rat), 699 mL/min/kg (dog), 465 mL/min/kg (monkey), and 708 mL/min/kg (human), respectively.

Results for the control (verapamil) demonstrated acceptable performance of the assay.

### **HM1010: Time-Dependent Inhibition of Cytochrome P450 Enzymes in Human Liver Microsomes**

#### **Testing Facility Study No.**

ZXAA-0010-DV-TB

### **STUDY SUMMARIES**

The purpose of this in-vitro study was to determine the time-dependent inhibitory potential of HM1010 on human cytochrome P450 (CYP) isozyme (1A2, 2B6, 2C8, 2C9, 2C19, 2D6 and 3A4) activity, using pooled human liver microsomes and a concentration-response  $IC_{50}$  method.

The study design is summarized below:

|                 |                                                                                                     |
|-----------------|-----------------------------------------------------------------------------------------------------|
| Test Article:   | HM1010                                                                                              |
| Concentrations: | 50.0, 33.3, 22.2, 5.55, 1.39, 0.348, 0.0870, 0.0218, 0.00545, and 0.00 (DMSO control) $\mu\text{M}$ |

|                    |                                                                                                                                                                                                                |
|--------------------|----------------------------------------------------------------------------------------------------------------------------------------------------------------------------------------------------------------|
| Control Articles:  | Fluvoxamine (1A2 inhibitor), Ticlopidine (2B6 inhibitor), Quercetin (2C8 inhibitor), Sulfaphenazole (2C9 inhibitor), Omeprazole (2C19 inhibitor), Paroxetine (2D6 inhibitor), and Mifepristone (3A4 inhibitor) |
| Concentrations:    | 50.0, 33.3, 22.2, 5.55, 1.39, 0.348, 0.0870, 0.0218, 0.00545, and 0.00 (DMSO control) $\mu$ M                                                                                                                  |
| Test System:       | Pooled human liver microsomes, mixed gender, at 0.1 mg/mL                                                                                                                                                      |
| Assay Buffer:      | 100 mM Potassium phosphate buffer, pH 7.4                                                                                                                                                                      |
| CYP450 Substrates: | Phenacetin (1A2), Bupropion (2B6), Amodiaquine (2C8), Diclofenac (2C9), Mephenytoin (2C19), Dextromethorphan (2D6), Testosterone (3A4), and Midazolam (3A4)                                                    |
| Concentrations:    | Approximate $K_m$ concentration for each respective isozyme (within the linear range of CYP-mediated metabolism)                                                                                               |
| Cofactor:          | $\beta$ -Nicotinamide adenine dinucleotide phosphate (NADPH)                                                                                                                                                   |
| Replicates:        | Two                                                                                                                                                                                                            |
| Pre-incubation:    | 0 and 30 minutes at 37°C with and without NADPH (1 mM)                                                                                                                                                         |
| Incubation:        | 30 minutes at 37°C                                                                                                                                                                                             |
| Bioanalysis:       | LC-MS/MS                                                                                                                                                                                                       |

No inhibition to minimal inhibition of human CYPs 1A2, 2B6, 2C8, 2C9, 2C19, 2D6, and 3A4 (midazolam and testosterone substrates) activity was observed at the highest HM1010 test concentration (50  $\mu$ M) in pooled human liver microsomes (0.1 mg/mL).

With pre-incubation in the presence of 1 mM NADPH, inhibition of these CYP isozymes by HM1010 at 50  $\mu$ M was less than 30%. Because full dose-response curves were not achieved, inhibition data was not curve fit to determine  $IC_{50}$  values for the assessment of time-dependent inhibition by HM1010.

The results for the positive control inhibitors are within the expected ranges, indicating acceptable performance of the assays.

### **HM1010: Time-Dependent Inhibition of Cytochrome P450 Enzymes in Human Liver Microsomes**

#### **Testing Facility Study No.**

ZXAA-0010-DV-TB

#### **STUDY SUMMARY**

The purpose of this in-vitro study was to determine the time-dependent inhibitory potential of HM1010 on human cytochrome P450 (CYP) isozyme (1A2, 2B6, 2C8, 2C9, 2C19, 2D6 and 3A4) activity, using pooled human liver microsomes and a concentration-response  $IC_{50}$  method.

The study design is summarized below:

|                   |                                                                                                                      |
|-------------------|----------------------------------------------------------------------------------------------------------------------|
| Test Article:     | HM1010                                                                                                               |
| Concentrations:   | 50.0, 33.3, 22.2, 5.55, 1.39, 0.348, 0.0870, 0.0218, 0.00545, and 0.00 (DMSO control) $\mu$ M                        |
| Control Articles: | Fluvoxamine (1A2 inhibitor), Ticlopidine (2B6 inhibitor), Quercetin (2C8 inhibitor), Sulfaphenazole (2C9 inhibitor), |

|                    |                                                                                                                                                             |
|--------------------|-------------------------------------------------------------------------------------------------------------------------------------------------------------|
|                    | Omeprazole (2C19 inhibitor), Paroxetine (2D6 inhibitor), and Mifepristone (3A4 inhibitor)                                                                   |
| Concentrations:    | 50.0, 33.3, 22.2, 5.55, 1.39, 0.348, 0.0870, 0.0218, 0.00545, and 0.00 (DMSO control) $\mu$ M                                                               |
| Test System:       | Pooled human liver microsomes, mixed gender, at 0.1 mg/mL                                                                                                   |
| Assay Buffer:      | 100 mM Potassium phosphate buffer, pH 7.4                                                                                                                   |
| CYP450 Substrates: | Phenacetin (1A2), Bupropion (2B6), Amodiaquine (2C8), Diclofenac (2C9), Mephenytoin (2C19), Dextromethorphan (2D6), Testosterone (3A4), and Midazolam (3A4) |
| Concentrations:    | Approximate $K_m$ concentration for each respective isozyme (within the linear range of CYP-mediated metabolism)                                            |
| Cofactor:          | $\beta$ -Nicotinamide adenine dinucleotide phosphate (NADPH)                                                                                                |
| Replicates:        | Two                                                                                                                                                         |
| Pre-incubation:    | 0 and 30 minutes at 37°C with and without NADPH (1 mM)                                                                                                      |
| Incubation:        | 30 minutes at 37°C                                                                                                                                          |
| Bioanalysis:       | LC-MS/MS                                                                                                                                                    |

No inhibition to minimal inhibition of human CYPs 1A2, 2B6, 2C8, 2C9, 2C19, 2D6, and 3A4 (midazolam and testosterone substrates) activity was observed at the highest HM1010 test concentration (50  $\mu$ M) in pooled human liver microsomes (0.1 mg/mL).

With pre-incubation in the presence of 1 mM NADPH, inhibition of these CYP isozymes by HM1010 at 50  $\mu$ M was less than 30%. Because full dose-response curves were not achieved, inhibition data was not curve fit to determine  $IC_{50}$  values for the assessment of time-dependent inhibition by HM1010.

The results for the positive control inhibitors are within the expected ranges, indicating acceptable performance of the assays.

### **HM1010: Induction Potential of Cytochrome P450 Enzymes (CYP1A2, CYP2B6 and CYP3A4) Using Human Cryopreserved Hepatocytes**

#### **Testing Facility Study No.**

ZXAA-0011-DV-DB

#### **STUDY SUMMARY**

The purpose of this in-vitro study was to determine the induction potential of HM1010 on human cytochrome P450 (CYP) isoenzyme (1A2, 2B6 and 3A4) activity. The study design is summarized below:

|                   |                                                                                    |
|-------------------|------------------------------------------------------------------------------------|
| Test Article:     | HM1010                                                                             |
| Concentrations:   | 2, 10, and 25 $\mu$ M                                                              |
| Control Articles: | Omeprazole (1A2), Phenobarbital (2B6), and Rifampicin (3A4)                        |
| Concentration:    | 50 $\mu$ M (omeprazole), 1000 $\mu$ M (phenobarbital), and 20 $\mu$ M (rifampicin) |
| Matrix:           | Inducible cryopreserved human hepatocytes three single-donor lots                  |
| Assay Buffer:     | InVitroGRO KHB                                                                     |

Substrates: Phenacetin (1A2), Bupropion (2B6), and Testosterone (3A4)  
Concentrations: 100  $\mu$ M (phenacetin), 150  $\mu$ M (bupropion), and 125  $\mu$ M (testosterone)  
Replicates: Three  
Assay conditions: 48 hours at 37°C in humidified 5% carbon dioxide incubator  
Analysis: LC-MS/MS (enzyme activity) and mRNA analysis

Induction of CYPs 1A2, 2B6 and 3A4 in human hepatocytes by HM1010 at 2, 10 and 25  $\mu$ M was observed in at least one of the three single-donor lots of hepatocytes based on increases in enzyme activity or mRNA expression (CYP1A2 with 2  $\mu$ M HM1010) that were >2-fold the vehicle control response.

CYP1A2 was induced by 25  $\mu$ M HM1010 in three single-donor lots of hepatocytes with fold-increases in enzyme activity of 2.46, 5.98 and 3.65 and by 10  $\mu$ M HM1010 in two of the three single-donor lots of hepatocytes with fold-increases in enzyme activity of 5.19 and 3.32. Based on enzyme activity, CYP1A2 was not induced by 2  $\mu$ M HM1010. At this concentration, observed increases in enzyme activity relative to the vehicle control are <2-fold and are <20% of the positive control response; however, based on an increases in mRNA expression, minimal induction of CYP1A2 (2.24-fold increase) was observed in one lot of the three single donor lots of hepatocytes.

CYP2B6 was induced by HM1010 at 2, 10, and 25  $\mu$ M in the three single-donor lots of hepatocytes. The induction appears concentration-dependent with mean fold-increases in enzyme activity of 3.00, 4.96, and 6.27 at 2  $\mu$ M, 10  $\mu$ M, and 25  $\mu$ M HM1010, respectively.

CYP3A4 was induced by HM1010 at 2, 10 and 25  $\mu$ M in at least one of the three single-donor lots of hepatocytes. The observed fold-increases in enzyme activity were minimal: 2.06 (one lot with 2  $\mu$ M HM1010); 2.20 and 2.12 (two lots with 10  $\mu$ M HM1010); and 2.07, 2.19 and 2.15 (three lots with 25  $\mu$ M HM1010).

Across three single-donor lots of hepatocytes, the average stability of HM1010 over 24 hours incubation with hepatocytes for both days of incubation was 0.6% at 2  $\mu$ M, 0.7% at 10  $\mu$ M and 0.3% at 25  $\mu$ M.

Results for the positive control articles (inducers) are within the expected ranges, indicating acceptable performance of the assays.

### **HM1010: Induction Potential of Cytochrome P450 Enzymes (CYP1A2, CYP2B6 and CYP3A4) Using Human Cryopreserved Hepatocytes**

#### **Testing Facility Study No.**

ZXAA-0011-DV-DB

The purpose of this in-vitro study was to determine the induction potential of HM1010 on human cytochrome P450 (CYP) isoenzyme (1A2, 2B6 and 3A4) activity. The study design is summarized below:

Test Article: HM1010  
Concentrations: 2, 10, and 25  $\mu$ M

|                   |                                                                                    |
|-------------------|------------------------------------------------------------------------------------|
| Control Articles: | Omeprazole (1A2), Phenobarbital (2B6), and Rifampicin (3A4)                        |
| Concentration:    | 50 $\mu$ M (omeprazole), 1000 $\mu$ M (phenobarbital), and 20 $\mu$ M (rifampicin) |
| Matrix:           | Inducible cryopreserved human hepatocytes three single-donor lots                  |
| Assay Buffer:     | InVitroGRO KHB                                                                     |
| Substrates:       | Phenacetin (1A2), Bupropion (2B6), and Testosterone (3A4)                          |
| Concentrations:   | 100 $\mu$ M (phenacetin), 150 $\mu$ M (bupropion), and 125 $\mu$ M (testosterone)  |
| Replicates:       | Three                                                                              |
| Assay conditions: | 48 hours at 37°C in humidified 5% carbon dioxide incubator                         |
| Analysis:         | LC-MS/MS (enzyme activity) and mRNA analysis                                       |

Induction of CYPs 1A2, 2B6 and 3A4 in human hepatocytes by HM1010 at 2, 10 and 25  $\mu$ M was observed in at least one of the three single-donor lots of hepatocytes based on increases in enzyme activity or mRNA expression (CYP1A2 with 2  $\mu$ M HM1010) that were >2-fold the vehicle control response.

CYP1A2 was induced by 25  $\mu$ M HM1010 in three single-donor lots of hepatocytes with fold-increases in enzyme activity of 2.46, 5.98 and 3.65 and by 10  $\mu$ M HM1010 in two of the three single-donor lots of hepatocytes with fold-increases in enzyme activity of 5.19 and 3.32. Based on enzyme activity, CYP1A2 was not induced by 2  $\mu$ M HM1010. At this concentration, observed increases in enzyme activity relative to the vehicle control are <2-fold and are <20% of the positive control response; however, based on an increases in mRNA expression, minimal induction of CYP1A2 (2.24-fold increase) was observed in one lot of the three single donor lots of hepatocytes.

CYP2B6 was induced by HM1010 at 2, 10, and 25  $\mu$ M in the three single-donor lots of hepatocytes. The induction appears concentration-dependent with mean fold-increases in enzyme activity of 3.00, 4.96, and 6.27 at 2  $\mu$ M, 10  $\mu$ M, and 25  $\mu$ M HM1010, respectively.

CYP3A4 was induced by HM1010 at 2, 10 and 25  $\mu$ M in at least one of the three single-donor lots of hepatocytes. The observed fold-increases in enzyme activity were minimal: 2.06 (one lot with 2  $\mu$ M HM1010); 2.20 and 2.12 (two lots with 10  $\mu$ M HM1010); and 2.07, 2.19 and 2.15 (three lots with 25  $\mu$ M HM1010).

Across three single-donor lots of hepatocytes, the average stability of HM1010 over 24 hours incubation with hepatocytes for both days of incubation was 0.6% at 2  $\mu$ M, 0.7% at 10  $\mu$ M and 0.3% at 25  $\mu$ M.

Results for the positive control articles (inducers) are within the expected ranges, indicating acceptable performance of the assays.
